# 1 **Spatiotemporal scales of dynamical functional networks –** 2 **using whole-brain modelling to identify the optimal** 3 **resolution**

4 Xenia Kobeleva <sup>1,2,3</sup>, Ane López-González <sup>2</sup>, Morten Kringelbach <sup>4,5</sup>, Gustavo Deco <sup>2,6,7,8</sup>

5 (1) Department of Neurology, University of Bonn, Venusberg-Campus 1, 53127 Bonn,  
6 Germany

7 (2) Center for Brain and Cognition, Computational Neuroscience Group, Universitat Pompeu  
8 Fabra, 08018 Barcelona, Spain

9 (3) German Center for Neurodegenerative Diseases (DZNE), Bonn, Venusberg-Campus 1,  
10 53127 Bonn, Germany

11 (4) Department of Psychiatry, University of Oxford, Oxford OX3 7JX, United Kingdom

12 (5) Center for Music in the Brain, Department of Clinical Medicine, Aarhus University, 8000  
13 Aarhus, Denmark

14 (6) Institució Catalana de la Recerca i Estudis Avançats (ICREA), 08010 Barcelona, Spain

15 (7) Department of Neuropsychology, Max Planck Institute for Human Cognitive and Brain  
16 Sciences, 04103 Leipzig, Germany

17 (8) School of Psychological Sciences, Monash University, Melbourne, Clayton, VIC 3800,  
18 Australia

19

20 **Corresponding author:** Dr. Xenia Kobeleva, Department of Neurology, University of Bonn,  
21 Venusberg-Campus 1, 53127 Bonn, Germany; email: [xenia.eaynt@gmail.com](mailto:xenia.eaynt@gmail.com)

22

## 23 **Abstract**

24 The brain can rapidly process and transfer information between cortical brain networks by  
25 dynamically transitioning between brain states. Here we study the switching activity between  
26 functional brain networks that have been estimated at various spatial scales from  $n = 100$  to  $n$   
27  $= 1000$  using resting-state fMRI data. We also generate timeseries at different temporal scales  
28 from milliseconds to seconds using whole-brain modelling. We calculate the entropy of  
29 switching activity between functional brain networks which represents the richness of the  
30 dynamical repertoire. We provide evidence that the entropy of functional network occurrence  
31 follows an inverted U-shaped curve with a maximum at a spatial scale between 200 and 300  
32 regions and at a temporal scale of 200 milliseconds.

33

34 **Keywords:** neuroscience, modelling, spatiotemporal, brain dynamics

## 35 Introduction

36 The brain can rapidly process and adapt to new information through transitioning between  
37 multiple cognitive states. There has been substantial interest in neuroimaging research to  
38 better understand how the brain executes these rapid transitions between cognitive states from  
39 an anatomical and functional perspective, e.g. through investigating *brain dynamics* that  
40 describe the changes of brain activity and brain network connectivity over time and space (Stitt  
41 et al. 2017). To derive metrics of brain dynamics, researchers have to decide on the temporal  
42 scale (meaning the sampling rate) and the spatial scale (meaning the spatial resolution) of the  
43 data. Whereas lower spatiotemporal scales (i.e., more coarse resolutions) are associated with  
44 loss of relevant information, higher spatiotemporal scales (i.e., finer resolutions) lead to  
45 increases of unwanted noise and enhanced computational complexity and inefficiencies. In  
46 practice, current brain dynamics studies vary widely in their choice of spatiotemporal scales.  
47 Therefore, the description of the brain dynamics remains a challenge to neuroscientific  
48 researchers not only due to the arbitrary choice of experimental parameters that massively  
49 influence the resulting metrics of brain dynamics. In fact, the fundamental question at which  
50 spatiotemporal scale the brain intrinsically transitions between functional states has so far  
51 remained unanswered.

52 Several studies have performed comparisons between spatial scales. In these studies, spatial  
53 scales and parcellation techniques were compared in regard to various metrics, such as  
54 reproducibility of resulting networks, agreement with other modalities such as anatomical  
55 connectivity, and their effect on prediction accuracy of neuropsychiatric conditions (Dadi et al.  
56 2019; Arslan et al. 2018; Messé 2019). For instance, Proix et al. (2016) investigated the effect  
57 of spatial scale on information content in a model of brain dynamics by decomposing the  
58 simulated timeseries using a principle component analysis and found an optimum at around  
59 140 regions. While all these studies have significantly contributed to our fundamental  
60 understanding of how different spatial scales affect the analyses of brain dynamics, they only  
61 focus on identifying the optimal spatial scale in isolation without taking into account the  
62 temporal scale. In empirical research practice, however, every measurement in brain dynamics  
63 features both a spatial and a temporal scale.

64 Experimental comparisons between temporal scales would require a comparison of several  
65 studies using different neuroimaging modalities, but there is still a lack of robust translations  
66 of brain dynamics metrics between different modalities. For this question dynamical whole-  
67 brain network models offer a practical solution to contrast different temporal scales. A previous  
68 study using a generative whole-brain network model compared brain dynamics between  
69 different temporal scales (2019) a temporal scale of 200 milliseconds captures the most  
70 relevant information on brain dynamics by calculating the entropy of switching between  
71 functional brain networks. As this study focused on the assessment of the optimal temporal

72 scale, it was not considered whether the optimum of temporal scale would be contingent on  
73 the spatial scale.

74 In this study, we address the previously neglected link between spatial and temporal scales in  
75 their optimal values for brain dynamics analyses by adding a temporal scale to our analyses  
76 of optimal spatial scales. We seek to provide an assessment of the optimal, integrated  
77 spatiotemporal scale at which the brain performs dynamical state reconfigurations. In addition,  
78 in identifying potential interaction effects between optimal spatial and temporal scales, we aim  
79 at reducing researchers' uncertainty inherent in choosing appropriate neuroimaging modalities  
80 and parcellation techniques. Thus, our study should not only have implications for a better  
81 understanding of the relevant spatial and temporal scale of dynamical reconfiguration of brain  
82 networks over time, but also contributes to the robustness and sensitivity of brain dynamics  
83 metrics as potential biomarkers of neuropsychiatric diseases.

84 To achieve this goal, we explore the switching behavior of spatial networks at spatial scales  
85 from 100 to 900 regions both in empirical timeseries extracted from resting-state fMRI with  
86 fixed temporal scales as well as in simulated timeseries with various temporal scales from  
87 milliseconds to seconds. We determine the relevant spatiotemporal scale by comparing the  
88 entropy of the switching activity, so that it maximizes the relevant informational content of  
89 spatiotemporal networks. In the discussion of our results, we derive recommendations for  
90 researchers, highlighting our finding that the relevant spatial scale for analyses of brain  
91 dynamics lies at 200-300 regions and at a optimal temporal scale of 200 milliseconds and thus  
92 contribute to an empirical basis of relevant parameters for studies of brain dynamics.

93

## 94 **Methods**

### 95 **Data acquisition and preprocessing**

96 We used resting state functional data from 94 of 100 unrelated subjects of the Human  
97 Connectome Project (HCP; Van Essen et al. 2013); six subjects were due to methodological  
98 reasons as FC matrices consisted of at least one N/A row in one of the higher parcellations.  
99 We further chose one of the four available resting-state fMRI scans of about 15 minutes  
100 duration (TR of 0.72 sec). During fMRI acquisition, subjects were instructed to keep their eyes  
101 open while looking at a fixation cross. A full description of the imaging parameters and minimal  
102 preprocessing pipeline can be found in Glasser et al. (2013). In short, after correction for  
103 motion, gradient and susceptibility distortions the fMRI data was aligned to an anatomical  
104 image. The aligned functional image was then corrected for intensity bias, demeaned and  
105 projected to a common surface space, which resulted in a cifti-file.

106 We also employed an independent dataset from the enhanced NKI Rockland study (Nooner  
107 et al. 2012). We chose fMRI data (TR = 2.0 sec) from the first 50 subjects who participated in  
108 a 10-minute resting-state fMRI scan with their eyes open and a fixation cross. We used the

109 preprocessed fMRI data (see McDonald et al. 2017 for preprocessing details). Briefly, fMRI  
110 data was corrected for slice timing and coregistered to the anatomical scan. Subsequently, we  
111 performed a nuisance variable regression and the data was transformed into MNI space and  
112 smoothed using a 6mm FWHM kernel.

113 Both studies were approved by the local ethical committees and informed consent was  
114 obtained from all subjects.

115 All fMRI data was filtered between 0.1 and 0.01 Hz to retain the relevant frequency range for  
116 further analyses. We obtain structural and functional matrices in different spatial scales using  
117 the Schaefer parcellation, which optimizes local gradient and global similarity measures of the  
118 fMRI signal in various spatial scales ranging from 100 to 1000 regions (Schaefer et al. 2018).  
119 In both fMRI datasets timeseries were extracted with the help of the connectome workbench  
120 for the HCP data and *fslmeants* for the NKI data. We correlated the timeseries of all regions  
121 with each other using the pairwise Pearson correlations and normalized the resulting r-values  
122 using the Fisher's transform.

123 To make our analyses more robust, we performed several iterations of the model fitting to the  
124 empirical data. To do so, the HCP fMRI data was split into two groups. The first 30 subjects  
125 were used for model fitting (see below). A subset of 10 subjects out of the second group was  
126 randomly selected in 20 iterations and their timeseries were concatenated for the estimation  
127 of the empirical spatiotemporal networks. The NKI dataset was used for validation of the model  
128 fitting.

129 To create a structural connectivity matrix as a basis for the whole-brain model, we generated  
130 a normative structural connectome depicting the fiber density in the required spatial scales,  
131 based on 32 HCP subjects (Horn et al. 2017; Setsompop et al. 2013) using the Lead-DBS  
132 toolbox version 2.0 (Horn et al. 2018). Structural matrices were constructed in the same spatial  
133 scales as the functional data.

134

### 135 **Whole-brain modelling**

136 The use of fMRI signals would normally limit our study in the temporal dimension. To overcome  
137 this shortcoming, we use a whole-brain model which allows us simulate data in varying  
138 timescales from milliseconds to seconds, while preserving the statistics of the empirical  
139 signals. We create a dynamic mean field model, which is conceptually based on pools of  
140 neurons that contain excitatory and inhibitory neurons. These neurons emit spontaneous  
141 neuronal noise which is broadcasted to the rest of the network. We further assume that multiple  
142 pools of neurons interact, as given by the interactions of the structural connectome (Deco et  
143 al. 2014). These assumptions are implemented through a modified DMF model based on the  
144 original reduction first proposed by Wong and Wang (2006).

145 A summary of the individual steps that were taken to create the model can be found in Figure  
146 1. In the model used in this study, NMDA receptors represent excitatory connections and  
147 GABA-A receptors represent inhibitory connections. Additionally, there are long-range  
148 connections mediated by AMPA receptors. Inhibitory sub-populations communicate  
149 reciprocally with excitatory sub-populations on a local level. Excitatory sub-populations are  
150 additionally linked with to other excitatory sub-populations via long-range connections. The  
151 weights of the links are based on the fiber density weights given by the structural connectome,  
152 scaled by a global scaling factor  $G$ .

153 We adjusted the dynamical parameters of the model so that excitatory subpopulations have a  
154 spontaneous firing rate of 3 Hz and inhibitory subpopulations have a rate of 9 Hz. The weight  
155 of feedback inhibition is adjusted for each excitatory subpopulation to obtain a firing rate of  
156 about 3 Hz, using a regulatory mechanism called Feedback Inhibition Control (Deco et al.  
157 2014).

158 The resulting neuronal signal is transformed into a simulated fMRI BOLD-signal by employing  
159 the Balloon-Windkessel hemodynamic model (Stephan et al. 2007), which depicts the  
160 transduction of the sum of inhibitory and excitatory neural activity to perfusion changes. To  
161 focus on the functionally relevant frequency range, we band-pass filtered the BOLD signals  
162 between 0.1 and 0.01 Hz (Glerean et al. 2012; Achard et al. 2006).

163 We perform the fitting to the empirical signals using the global coupling parameter, which  
164 adjusts the coupling of the connections so that the fit of simulated brain dynamics to the  
165 empirical brain dynamics is maximized. The global scaling parameter is the only parameter  
166 that is adjusted according to the empirical data using model fitting (see below).

167 The fitting of the data was performed by adjusting the global scaling factor to improve the fit to  
168 three different metrics; average functional connectivity (FC), the Kuramoto synchronization  
169 index, and dynamical functional connectivity (DFC) (below). Each of these metrics represents  
170 different properties of empirical signal, so performing a good fitting of the three measures  
171 ensures maintaining biologically plausible signal statistics in the simulated timeseries. Using  
172 this model, we created simulated BOLD data of 10 subjects.

173 To obtain robust fitting values, we performed 10 iterations of the fitting of 10 randomly chosen  
174 subsets from the HCP dataset and validate the fitting using the NKI dataset.

175

176 Dynamical measures used for the fitting:

177 Average FC: The average FC was created by correlating BOLD signals pairwise over the  
178 complete acquisition period using Pearson correlations. We compared the empirical and  
179 simulated FC using the Pearson correlation.

180 Kuramoto synchronization index: The synchronization index measures the global level of  
181 phase synchronization. It is calculated as the mean of the Kuramoto order parameter  $R(t)$   
182 across time, which depicts the average phase  $\varphi$  of the system across  $n$  regions.

$$183 \quad R(t) = \left| \frac{\sum_{k=1}^n e^{i\varphi_k(t)}}{n} \right| \quad (1)$$

184  
185 We extracted the Kuramoto synchronization index by detrending the filtered fMRI timeseries  
186 and calculating the phases of the timeseries of each region using the Hilbert transform. We  
187 calculated the differences between empirical and simulated Kuramoto synchronization index,  
188 that has been previously proven to be suitable to define the dynamical working point of  
189 dynamical whole-brain models (Deco et al. 2017).

190 DFC: We evaluated the temporal dependencies of spatial correlation using the DFC. We first  
191 extracted the difference of phases between regions using the cosine, resulting in a similarity  
192 matrix representation. Subsequently, we divided the regional phase differences into time  
193 windows of about two seconds and computed the correlations between the phase similarity  
194 matrices between time windows, which resulted in a representation of spatiotemporal  
195 fluctuations of phases.

196

### 197 **Extraction of spatiotemporal networks using ICA and calculation of entropy**

198 To retrieve different temporal scales from the simulated BOLD data in the range of milliseconds  
199 to seconds, the timeseries were binned by averaging the signals in windows of the width of the  
200 according timescale. The temporal scale of the empirical data was determined by the TR (HCP:  
201 720 ms, NKI: 2000 ms). We then extracted spacetime motifs from the empirical and simulated  
202 timeseries. To reduce dimensionality of the data, the timeseries were binarized using the point-  
203 process binarization algorithm for BOLD signals (Tagliazucchi et al. 2012).

204 To estimate the number of relevant spatiotemporal networks, we applied an adaptation of an  
205 eigenvalue analysis for assessing the statistical significance of resulting networks (Peyrache  
206 et al. 2010), as introduced by Lopes-dos-Santos, Ribeiro, and Tort (2013). This method finds  
207 the number of principal components within the event matrix that have significantly larger  
208 eigenvalues compared to a normal random matrix as introduced by Marčenko and Pastur  
209 (1967). After determining the number of relevant spatiotemporal networks, we extracted these  
210 networks by applying an ICA to the binarized event matrix, resulting in a matrix of  
211 spatiotemporal networks with  $n$  brain regions and  $c$  independent components.

212 Lastly, we evaluated the resulting temporal evolution of spatiotemporal networks by tracking  
213 their activity over time (see Figure 2B). Through projection of the binarized event matrix onto  
214 the network matrix, the similarity between each network and the whole-brain activity at each

215 time point could be assessed. This resulted in an activity matrix of the temporal activity of each  
216 network:

$$217 \quad A_{cb} = e_b^T P_c e_b \quad (2)$$

218 with  $e$  being the event matrix  $n$  (with dimension number of regions  $\times$  binned time points) and  
219 the projection matrix  $P_c$  defined as:

$$220 \quad P_c = \bar{w}_c \otimes \bar{w}_c^T = \bar{w}_c \bar{w}_c^T \quad (3)$$

221 where  $\otimes$  is the outer product operator and  $\bar{w}_c$  one of the extracted ICA components from the  
222 event matrix.

223 By calculating the ratio of activity of each network in relation to overall activity, we were able  
224 to retrieve a probability of each network:

$$225 \quad p(c) = \frac{\sum_b A_{cb}}{\sum_{c,b} A_{cb}} \quad (4)$$

226

227 Using these probabilities, we computed the entropy of occurrence of each network,  
228 representing the diversity of switching activity between spacetime networks.

229

$$230 \quad H = - \sum_c p(c) \log(p(c)) \quad (5)$$

231 The entropy was then normalized for the resulting number of networks.

232

## 233 **Results**

234 We aimed to define the optimal spatiotemporal scale that captured the most relevant  
235 information about the temporal evolution of functional networks. We extracted timeseries at  
236 different parcellations at different spatial scales (from  $n = 100$  to  $n = 1000$ ) in the empirical  
237 data. Furthermore, we created a dynamic mean-field model to create timeseries at various  
238 temporal scales from milliseconds to seconds (Figure 1). Using both simulated and empirical  
239 timeseries, we explored the probability of occurrence of meaningful functional spatiotemporal  
240 networks over time. We calculated the entropy of these probabilities' occurrence of each  
241 network as a proxy of the diversity of switching activity between spatiotemporal networks  
242 (Figure 2).

243

### 244 **Validation of the whole-brain model**

245 The dynamic mean field model is a neuronal model that recreates inhibitory and excitatory  
246 synaptic dynamics (including AMPA, GABA and NMDA receptors) following the structure given  
247 by the underlying anatomical connectivity. By using the steps detailed in Figure 1 and following  
248 the constraints of anatomical connectivity as provided by the normative structural connectome,  
249 we were able to create realistic neuronal timeseries at the scale of milliseconds to seconds

250 using the dynamic mean field model. To ensure the robustness of the model, we fitted the  
251 resulting simulated BOLD timeseries to the empirical BOLD timeseries from two independent  
252 datasets using the DFC and the global synchronization level (see Figure 3). For each spatial  
253 scale, the fitting resulted in two optima at a global coupling value  $G$  between 1.55 and 1.85  
254 and at between 2.2 and 2.5. We chose the first peak to create the mean-field model, as using  
255 the first peak resulted in an adequate representation of the empirical dataset with comparable  
256 numbers of spatiotemporal networks. In contrast, the second peak had much lower numbers  
257 of spatiotemporal networks (e.g. 5 networks at a spatial scale of 100 regions).

258

### 259 **Entropy of evolution of spatiotemporal networks**

260 The evolution of spatiotemporal networks over time and their probabilities of occurrence allow  
261 us to estimate the richness of the dynamical repertoire at various spatiotemporal scales from  
262 a probabilistic perspective. In Figure 4, we display the entropy of spatiotemporal networks as  
263 a function of the spatial and temporal scale in the empirical and simulated dataset. As the  
264 number of networks was contingent on the spatial scale used, we corrected the entropy for the  
265 logarithm of the number of networks. We discovered an inverted U-shape form of the entropy  
266 both of the empirical and simulated timeseries, based on calculating the entropy as a function  
267 of probability of spatiotemporal networks across time. Regarding the spatial scale, the maximal  
268 entropy was found on a scale between 200 and 300 regions, but with only a minor decrease  
269 at scales with 100 or 400 regions. At scales above 400 regions, we observed a drop in entropy  
270 with a further decrease with increasing numbers of regions. Regarding the temporal scale, the  
271 highest entropy was to be found at 200 ms. Taking both scales into account, the highest level  
272 of entropy could be found at a temporal scale of 200 ms with similar values of spatial scales  
273 between 100 to 300 regions. At increasing temporal scales at the range of seconds, the highest  
274 entropy was achieved with 300 regions and to a slightly smaller degree with 100 and 200  
275 regions.

276

### 277 **Spatiotemporal networks across spatial and temporal scales**

278 Figure 2 summarizes the workflow to create the spatiotemporal networks from the binned data  
279 across different spatial and temporal scales. Using the empirical and simulated data, we  
280 determined the number of networks by counting the number of eigenvalues above the  
281 maximum of the eigenvalues, as given by the null hypothesis distribution based on random  
282 matrix theory as given by the Marčenko–Pastur distribution. To ensure that the simulated  
283 timeseries captured the relevant characteristics of the empirical data, we also compared the  
284 number of resulting networks between the empirical and simulated timeseries, which followed  
285 a similar trend. We observed a linear increase of the number of networks at an increasing  
286 spatial scale in both empirical and simulated datasets, starting with an average of 13.72



287 (empirical) vs. 16.0 (simulated) networks at a scale of  $n = 100$  to over 22.29 (empirical) vs.  
288 27.0 (simulated) networks at scale of  $n = 200$  until up to an average 67.79 (empirical) networks  
289 at a scale of  $n = 900$ .

290 An example depicting the spatial distribution of the resulting empirical and simulated  
291 spatiotemporal networks at the spatial scale of  $n = 200$  with associated probabilities of each  
292 network can be found in Figure 5. At the lower spatial scales (e.g.  $n = 200$ ), the networks  
293 resembled classical resting state networks. At higher scales, more networks arose—with a  
294 significant proportion of the networks having a low probability of occurrence (below 1%, as can  
295 be seen for a network with  $n = 900$  in supplementary figure S1).

296

## 297 **Discussion**

298 In this study, we investigated the most relevant optimal spatiotemporal scale at which  
299 fundamental macroscopic dynamical processes within the brain take place. We followed  
300 functional spatiotemporal networks over time not only at different spatial scales, but through  
301 the use of a dynamic mean-field model also at fine-grained temporal scales from milliseconds  
302 to seconds. Across empirical and simulated functional timeseries, we generated evidence that  
303 the entropy of network occurrence followed an inverted U-shaped curve with a maximum at a  
304 spatial scale between 200 and 300 regions and at a temporal scale of 200 milliseconds.

305 Our findings are consistent with the study by Proix et al. (2016), who investigated the  
306 information content of the effect of a perturbation paradigm on functional connectivity in a  
307 dynamical model, and who also found an inverted U-shaped function with an optimum of  
308 around 140 regions. Most other prior studies rather focused on the effect of spatial scales more  
309 from an analytical point view in regard to reproducibility (Arslan et al. 2018) or prediction  
310 accuracy (Dadi et al. 2019; Abraham et al. 2017) with optimal values between 100 and 150  
311 regions; however, our focus was more general in regard to the functionally relevant scale of  
312 brain dynamics. Nonetheless, even when considering prediction accuracy or reproducibility  
313 more broadly (i.e., as measures of relevant information content), our findings on entropy of  
314 brain dynamics are complementary to these measures. Moreover, we join the argument of  
315 these studies that although choosing a higher number of regions for analyses of brain  
316 dynamics adds complexity to the representation of the dynamical repertoire of the human  
317 brain, this additional information is not necessarily more relevant. As shown by our analyses,  
318 additional complexity as given by increased spatiotemporal scales can be detrimental—not  
319 only increasing the computational cost of the analysis, but also adding irrelevant and noisy  
320 signals to the analyses.

321 Our findings have several implications for future research of brain dynamics. First, we were  
322 able to reproduce the finding of the optimal temporal scale of 200 ms (Deco, Cruzat, and  
323 Kringelbach 2019). Our findings reflect experimental results of temporal dynamics of conscious

324 processes that operate at similar temporal scales and typically involve a rapid temporal  
325 sequence of information stabilization and transfer (Mai, Grootswagers, and Carlson 2019;  
326 Wutz et al. 2014; Salti et al. 2015). On top of that, our study shows that the optimal temporal  
327 scale represents a general rule and is not contingent on the spatial scale used. For researchers  
328 aiming to extract the most relevant information content in their analyses of brain dynamics, we  
329 therefore advise to either use neuroimaging modalities operating at this optimal temporal scale  
330 (e.g. MEG or EEG) or augment their analyses with whole-brain modelling, which allows to take  
331 other temporal scales into consideration. Second, our study provides an empirical basis for  
332 neuroimaging studies using dimensionality reduction techniques while preserving the most  
333 relevant information of brain dynamics. This is because we provided evidence that a spatial  
334 scale between 200 and 300 regions is sufficient to capture the most relevant information on  
335 macroscopic brain dynamics. While lower scales may be associated with a loss of information,  
336 higher spatial scales introduce irrelevant and noisy functional networks.

### 337 **Limitations and outlook**

338 We used independent component analysis (ICA) to derive functional networks at different  
339 scales. As any other method, ICA is not free of underlying assumptions and especially  
340 assumes maximal spatial independence of the networks (Jutten and Herault 1991). Future  
341 studies could consider additional analyses using other metrics such as network measures or  
342 apply emerging techniques that specifically consider the change of spatial composition of  
343 functional networks over time (Geniesse et al. 2019). As Arslan et al. (2018) and Hilger et al.  
344 (2020) demonstrated in their studies that network measures of integration and segregation are  
345 largely altered by the spatial scale, appropriate correction techniques should be used for such  
346 analyses across scales. In regard to the parcellation used, we used the Schaefer parcellation  
347 for our analyses across scales, which is ideal for cross-study comparisons at increasing spatial  
348 scales because it offers fine-grained parcellations at various spatial scales in both MNI and  
349 surface space. Future studies could also consider other fine-grained parcellations (Hagmann  
350 et al. 2008) and consider comparing the contribution of cortical versus subcortical regions on  
351 the dynamical repertoire of the brain which might operate at other temporal scales during  
352 subconscious processes (Ji et al. 2019).

353 Overall, our results suggest that the brain operates at an optimum of about 200 – 300 regions  
354 and a timescale of 200 milliseconds. We therefore provide a framework for a general  
355 understanding of spatiotemporal dynamics of brain processing, which could be an inspiration  
356 for future studies to harmonize spatiotemporal scales.

357

358

359

360

361 **Acknowledgements**

362 X. K. was supported by a short-term fellowship of the European Molecular Biology  
363 Organization (n. 7366) and by an InEurope fellowship of the International Brain Research  
364 Organization. G.D. is supported by the Spanish Research Project PSI2016-75688-P  
365 (AEI/FEDER, EU), by the European Union's Horizon 2020 Research and Innovation  
366 Programme under grant agreements n. 720270 (HBP SGA1) and n. 785907 (HBP SGA2), and  
367 by the Catalan AGAUR Programme 2017 SGR 1545. MLK is supported by the ERC  
368 Consolidator Grant: CAREGIVING (n. 615539), Center for Music in the Brain, funded by the  
369 Danish National Research Foundation (DNRF117), and Centre for Eudaimonia and Human  
370 Flourishing funded by the Pettit and Carlsberg Foundations.

## 371 References

- 372 Abraham, Alexandre, Michael P. Milham, Adriana Di Martino, R. Cameron Craddock, Dimitris  
373 Samaras, Bertrand Thirion, and Gael Varoquaux. 2017. "Deriving Reproducible  
374 Biomarkers from Multi-Site Resting-State Data: An Autism-Based Example."  
375 *NeuroImage* 147 (February): 736–45.  
376 <https://doi.org/10.1016/j.neuroimage.2016.10.045>.
- 377 Achard, Sophie, Raymond Salvador, Brandon Whitcer, John Suckling, and Ed Bullmore.  
378 2006. "A Resilient, Low-Frequency, Small-World Human Brain Functional Network with  
379 Highly Connected Association Cortical Hubs." *The Journal of Neuroscience: The*  
380 *Official Journal of the Society for Neuroscience* 26 (1): 63–72.  
381 <https://doi.org/10.1523/JNEUROSCI.3874-05.2006>.
- 382 Arslan, Salim, Sofia Ira Ktena, Antonios Makropoulos, Emma C. Robinson, Daniel Rueckert,  
383 and Sarah Parisot. 2018. "Human Brain Mapping: A Systematic Comparison of  
384 Parcellation Methods for the Human Cerebral Cortex." *NeuroImage* 170 (April): 5–30.  
385 <https://doi.org/10.1016/j.neuroimage.2017.04.014>.
- 386 Dadi, Kamalaker, Mehdi Rahim, Alexandre Abraham, Darya Chyzyk, Michael Milham,  
387 Bertrand Thirion, Gaël Varoquaux, and Alzheimer's Disease Neuroimaging Initiative.  
388 2019. "Benchmarking Functional Connectome-Based Predictive Models for Resting-  
389 State FMRI." *NeuroImage* 192: 115–34.  
390 <https://doi.org/10.1016/j.neuroimage.2019.02.062>.
- 391 Deco, Gustavo, Josephine Cruzat, and Morten L. Kringelbach. 2019. "Brain Songs Framework  
392 Used for Discovering the Relevant Timescale of the Human Brain." *Nature*  
393 *Communications* 10 (1): 583. <https://doi.org/10.1038/s41467-018-08186-7>.
- 394 Deco, Gustavo, Morten L. Kringelbach, Viktor K. Jirsa, and Petra Ritter. 2017. "The Dynamics  
395 of Resting Fluctuations in the Brain: Metastability and Its Dynamical Cortical Core."  
396 *Scientific Reports* 7 (1): 3095. <https://doi.org/10.1038/s41598-017-03073-5>.
- 397 Deco, Gustavo, Adrián Ponce-Alvarez, Patric Hagmann, Gian Luca Romani, Dante Mantini,  
398 and Maurizio Corbetta. 2014. "How Local Excitation–Inhibition Ratio Impacts the Whole  
399 Brain Dynamics." *The Journal of Neuroscience* 34 (23): 7886–98.  
400 <https://doi.org/10.1523/JNEUROSCI.5068-13.2014>.
- 401 Geniesse, Caleb, Olaf Sporns, Giovanni Petri, and Manish Saggari. 2019. "Generating  
402 Dynamical Neuroimaging Spatiotemporal Representations (DyNeuSR) Using  
403 Topological Data Analysis." *Network Neuroscience* 3 (3): 763–78.  
404 [https://doi.org/10.1162/netn\\_a\\_00093](https://doi.org/10.1162/netn_a_00093).
- 405 Glasser, Matthew F., Stamatiou N. Sotiropoulos, J. Anthony Wilson, Timothy S. Coalson,  
406 Bruce Fischl, Jesper L. Andersson, Junqian Xu, et al. 2013. "The Minimal  
407 Preprocessing Pipelines for the Human Connectome Project." *NeuroImage* 80  
408 (October): 105–24. <https://doi.org/10.1016/j.neuroimage.2013.04.127>.
- 409 Glerean, Enrico, Juha Salmi, Juha M. Lahnakoski, Iiro P. Jääskeläinen, and Mikko Sams.  
410 2012. "Functional Magnetic Resonance Imaging Phase Synchronization as a Measure  
411 of Dynamic Functional Connectivity." *Brain Connectivity* 2 (2): 91–101.  
412 <https://doi.org/10.1089/brain.2011.0068>.
- 413 Hagmann, Patric, Leila Cammoun, Xavier Gigandet, Reto Meuli, Christopher J. Honey, Van J.  
414 Wedeen, and Olaf Sporns. 2008. "Mapping the Structural Core of Human Cerebral  
415 Cortex." *PLOS Biology* 6 (7): e159. <https://doi.org/10.1371/journal.pbio.0060159>.
- 416 Hilger, Kirsten, Makoto Fukushima, Olaf Sporns, and Christian J. Fiebach. 2020. "Temporal  
417 Stability of Functional Brain Modules Associated with Human Intelligence." *Human*  
418 *Brain Mapping* 41 (2): 362–72. <https://doi.org/10.1002/hbm.24807>.
- 419 Horn, Andreas, Ningfei Li, Till A. Dembek, Ari Kappel, Chadwick Boulay, Siobhan Ewert, Anna  
420 Tietze, et al. 2018. "Lead-DBS v2: Towards a Comprehensive Pipeline for Deep Brain  
421 Stimulation Imaging." *NeuroImage* 184 (September): 293–316.  
422 <https://doi.org/10.1016/j.neuroimage.2018.08.068>.
- 423 Horn, Andreas, Martin Reich, Johannes Vorwerk, Ningfei Li, Gregor Wenzel, Qianqian Fang,  
424 Tanja Schmitz-Hübsch, et al. 2017. "Connectivity Predicts Deep Brain Stimulation

- 425 Outcome in Parkinson Disease.” *Annals of Neurology* 82 (1): 67–78.  
426 <https://doi.org/10.1002/ana.24974>.
- 427 Ji, Jie Lisa, Marjolein Spronk, Kaustubh Kulkarni, Grega Repovš, Alan Anticevic, and Michael  
428 W. Cole. 2019. “Mapping the Human Brain’s Cortical-Subcortical Functional Network  
429 Organization.” *NeuroImage* 185 (January): 35–57.  
430 <https://doi.org/10.1016/j.neuroimage.2018.10.006>.
- 431 Jutten, Christian, and Jeanny Herault. 1991. “Blind Separation of Sources, Part I: An Adaptive  
432 Algorithm Based on Neuromimetic Architecture.” *Signal Processing* 24 (1): 1–10.  
433 [https://doi.org/10.1016/0165-1684\(91\)90079-X](https://doi.org/10.1016/0165-1684(91)90079-X).
- 434 Lopes-dos-Santos, Vitor, Sidarta Ribeiro, and Adriano B.L. Tort. 2013. “Detecting Cell  
435 Assemblies in Large Neuronal Populations.” *Journal of Neuroscience Methods* 220 (2):  
436 149–66. <https://doi.org/10.1016/j.jneumeth.2013.04.010>.
- 437 Mai, Anh-Thu, Tijn Grootswagers, and Thomas A. Carlson. 2019. “In Search of Consciousness:  
438 Examining the Temporal Dynamics of Conscious Visual Perception Using MEG Time-  
439 Series Data.” *Neuropsychologia* 129 (June): 310–17.  
440 <https://doi.org/10.1016/j.neuropsychologia.2019.04.015>.
- 441 Marčenko, V.A., and Leonid Pastur. 1967. “Distribution of Eigenvalues for Some Sets of  
442 Random Matrices.” *Math USSR Sb* 1 (January): 457–83.
- 443 McDonald, Amalia R., Jordan Muraskin, Nicholas T. Van Dam, Caroline Froehlich, Benjamin  
444 Puccio, John Pellman, Clemens C. C. Bauer, et al. 2017. “The Real-Time fMRI  
445 Neurofeedback Based Stratification of Default Network Regulation Neuroimaging Data  
446 Repository.” *NeuroImage* 146: 157–70.  
447 <https://doi.org/10.1016/j.neuroimage.2016.10.048>.
- 448 Messé, Arnaud. 2019. “Parcellation Influence on the Connectivity-Based Structure–Function  
449 Relationship in the Human Brain.” *Human Brain Mapping* n/a (n/a).  
450 <https://doi.org/10.1002/hbm.24866>.
- 451 Nooner, Kate Brody, Stanley J. Colcombe, Russell H. Tobe, Maarten Mennes, Melissa M.  
452 Benedict, Alexis L. Moreno, Laura J. Panek, et al. 2012. “The NKI-Rockland Sample:  
453 A Model for Accelerating the Pace of Discovery Science in Psychiatry.” *Frontiers in  
454 Neuroscience* 6 (October). <https://doi.org/10.3389/fnins.2012.00152>.
- 455 Peyrache, Adrien, Karim Benchenane, Mehdi Khamassi, Sidney I. Wiener, and Francesco P.  
456 Battaglia. 2010. “Principal Component Analysis of Ensemble Recordings Reveals Cell  
457 Assemblies at High Temporal Resolution.” *Journal of Computational Neuroscience* 29  
458 (1): 309–25. <https://doi.org/10.1007/s10827-009-0154-6>.
- 459 Proix, Timothée, Andreas Spiegler, Michael Schirner, Simon Rothmeier, Petra Ritter, and  
460 Viktor K. Jirsa. 2016. “How Do Parcellation Size and Short-Range Connectivity Affect  
461 Dynamics in Large-Scale Brain Network Models?” *NeuroImage* 142 (November): 135–  
462 49. <https://doi.org/10.1016/j.neuroimage.2016.06.016>.
- 463 Salti, Moti, Simo Monto, Lucie Charles, Jean-Remi King, Lauri Parkkonen, and Stanislas  
464 Dehaene. 2015. “Distinct Cortical Codes and Temporal Dynamics for Conscious and  
465 Unconscious Percepts.” *eLife* 4 (May). <https://doi.org/10.7554/eLife.05652>.
- 466 Schaefer, Alexander, Ru Kong, Evan M. Gordon, Timothy O. Laumann, Xi-Nian Zuo, Avram J.  
467 Holmes, Simon B. Eickhoff, and B. T. Thomas Yeo. 2018. “Local-Global Parcellation of  
468 the Human Cerebral Cortex from Intrinsic Functional Connectivity MRI.” *Cerebral  
469 Cortex* 28 (9): 3095–3114. <https://doi.org/10.1093/cercor/bhx179>.
- 470 Setsompop, K., R. Kimmlingen, E. Eberlein, T. Witzel, J. Cohen-Adad, J. A. McNab, B. Keil, et  
471 al. 2013. “Pushing the Limits of in Vivo Diffusion MRI for the Human Connectome  
472 Project.” *NeuroImage* 80 (October): 220–33.  
473 <https://doi.org/10.1016/j.neuroimage.2013.05.078>.
- 474 Stephan, Klaas Enno, Nikolaus Weiskopf, Peter M. Drysdale, Peter A. Robinson, and Karl J.  
475 Friston. 2007. “Comparing Hemodynamic Models with DCM.” *NeuroImage* 38 (3): 387–  
476 401. <https://doi.org/10.1016/j.neuroimage.2007.07.040>.
- 477 Stitt, Iain, Karl J. Hollensteiner, Edgar Galindo-Leon, Florian Pieper, Eva Fiedler, Thomas  
478 Stieglitz, Gerhard Engler, Guido Nolte, and Andreas K. Engel. 2017. “Dynamic  
479 Reconfiguration of Cortical Functional Connectivity across Brain States.” *Scientific  
480 Reports* 7 (1): 1–14. <https://doi.org/10.1038/s41598-017-08050-6>.

- 481 Tagliazucchi, Enzo, Pablo Balenzuela, Daniel Fraiman, and Dante R. Chialvo. 2012. "Criticality  
482 in Large-Scale Brain fMRI Dynamics Unveiled by a Novel Point Process Analysis."  
483 *Frontiers in Physiology* 3: 15. <https://doi.org/10.3389/fphys.2012.00015>.
- 484 Van Essen, David C., Stephen M. Smith, Deanna M. Barch, Timothy E. J. Behrens, Essa  
485 Yacoub, and Kamil Ugurbil. 2013. "The WU-Minn Human Connectome Project: An  
486 Overview." *NeuroImage, Mapping the Connectome*, 80 (October): 62–79.  
487 <https://doi.org/10.1016/j.neuroimage.2013.05.041>.
- 488 Wong, K.-F. 2006. "A Recurrent Network Mechanism of Time Integration in Perceptual  
489 Decisions." *Journal of Neuroscience* 26 (4): 1314–28.  
490 <https://doi.org/10.1523/JNEUROSCI.3733-05.2006>.
- 491 Wutz, Andreas, Nathan Weisz, Christoph Braun, and David Melcher. 2014. "Temporal  
492 Windows in Visual Processing: 'Prestimulus Brain State' and 'Poststimulus Phase  
493 Reset' Segregate Visual Transients on Different Temporal Scales." *The Journal of  
494 Neuroscience* 34 (4): 1554–65. <https://doi.org/10.1523/JNEUROSCI.3187-13.2014>.
- 495  
496

497 **Figures**

498

A. Extraction of empirical structural and functional connectomes

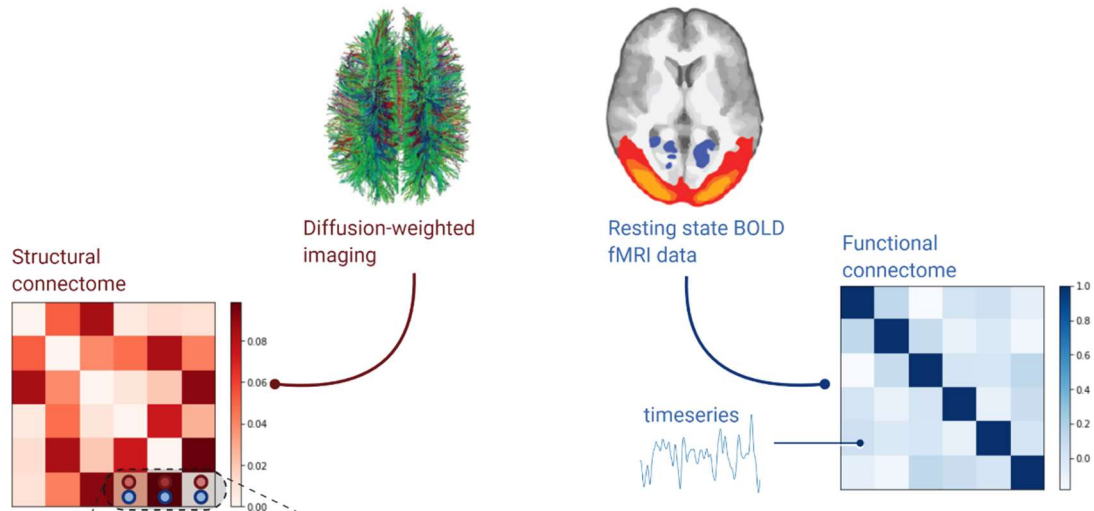

B. Creation of dynamic mean field model

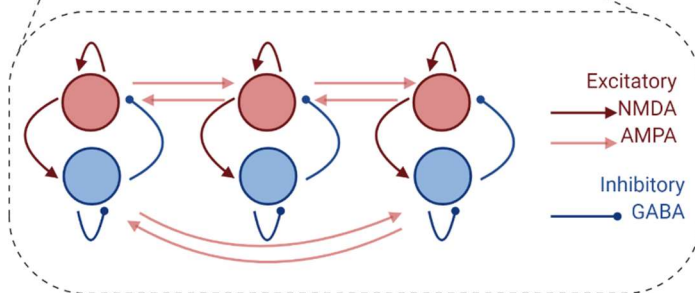

C. Comparison of empirical and simulated functional timeseries (model fitting)

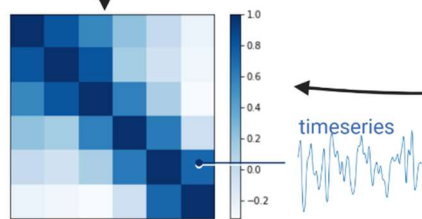

- Parameters for fitting (global coupling parameter)
- average functional connectivity
  - dynamical functional connectivity
  - metastability

499

500 Figure 1. Whole-brain modelling steps to create functional timeseries in different temporal  
501 scales from empirical BOLD data. A. Extraction of BOLD timeseries from fMRI data and  
502 creation of structural connectome from diffusion-weighted data. B. Whole brain modelling of  
503 the excitatory and inhibitory neuronal sub-populations, taking into account the connections  
504 between regions through the weights of the structural connectome. C. Fitting the simulated  
505 functional timeseries to the empirical functional timeseries using metrics of average functional  
506 connectivity, Kuramoto synchronization index and dynamical functional connectivity.

507

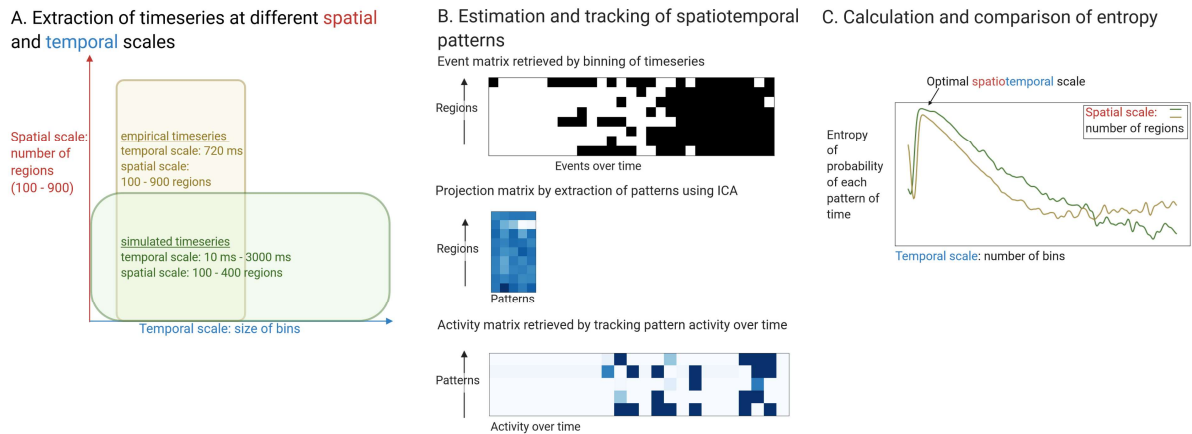

508

509 Figure 2. Extraction of spatiotemporal networks at different spatial and temporal scales. A.  
510 Extraction of a fixed temporal scale (given by TR) but different spatial scale of the empirical  
511 BOLD data and varying temporal scales (from milliseconds to seconds) of the simulated  
512 neuronal data. B. Binning of timeseries to create events over time, estimation of networks  
513 within data using ICA. Tracking of the resulting networks over time by projecting the event  
514 matrix onto the networks. C. Computation of the entropy of the activity of the networks as a  
515 function of their probability over time and comparison of the entropy across spatial and  
516 temporal scales.

517



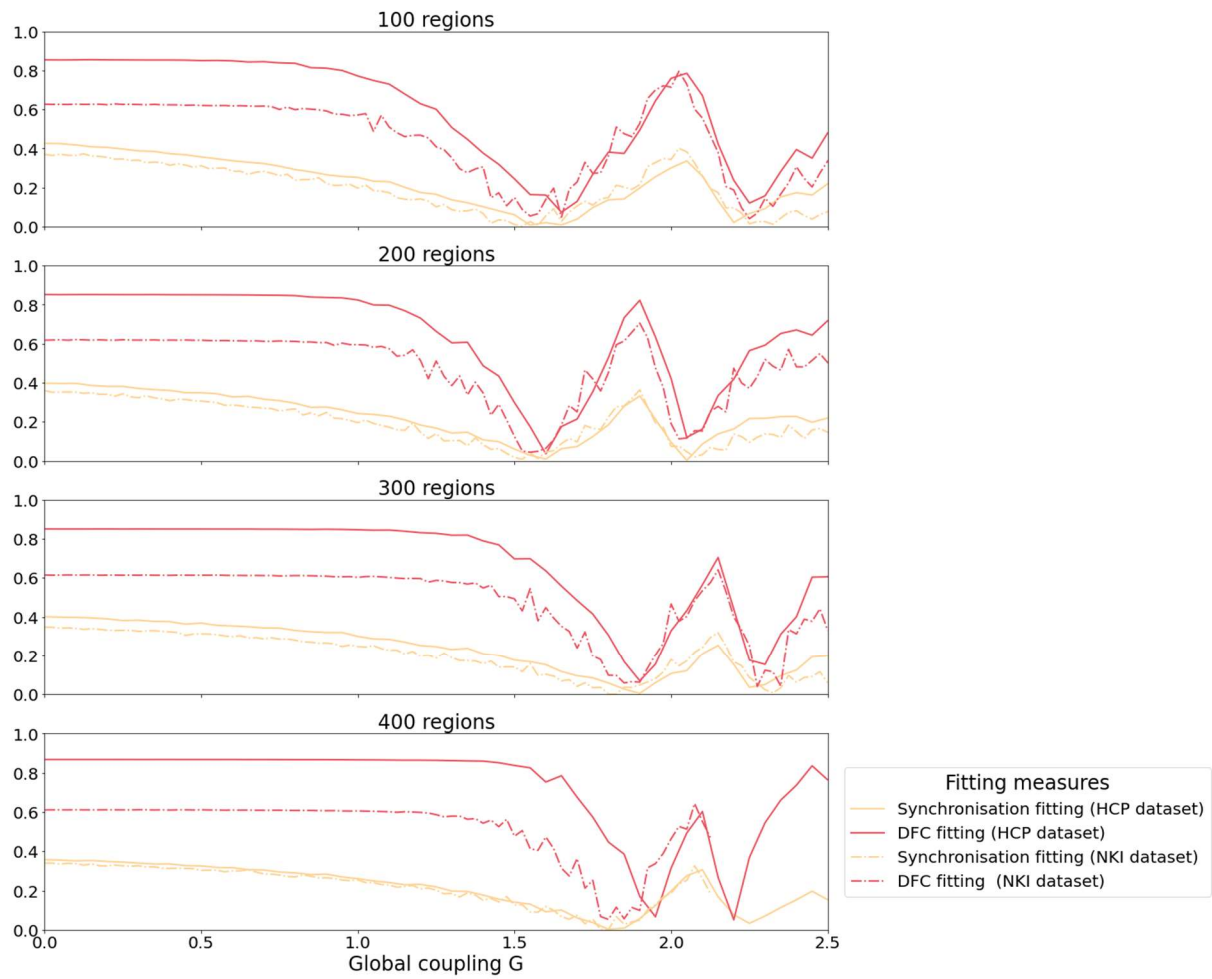

518

519 Figure 3. Fitting of the optimal working point of the model employing the global synchronization  
520 level and dynamical functional connectivity (DFC) across two independent datasets (HCP,  
521 NKI).

522

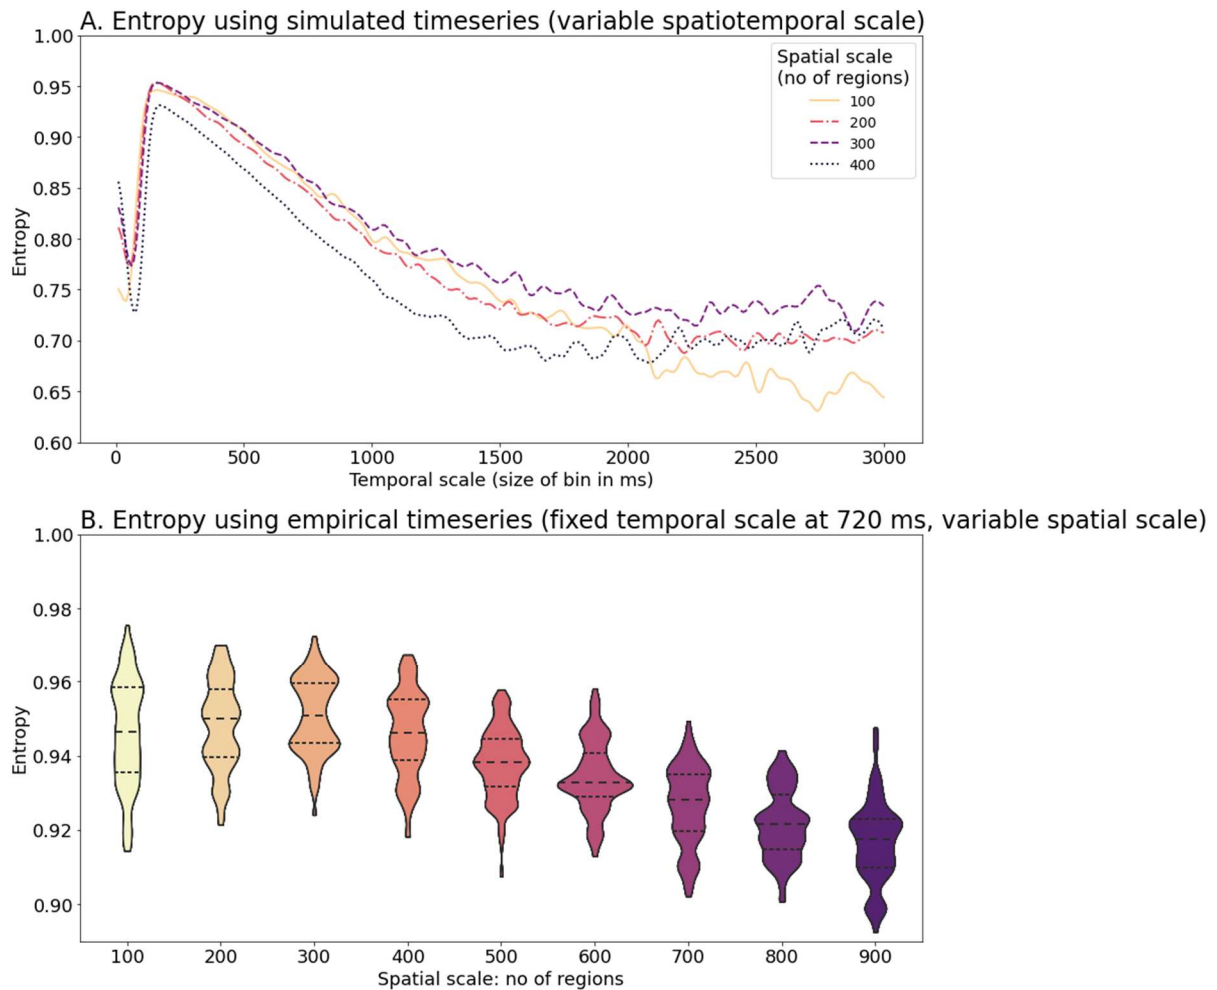

523

524 Figure 4. Entropy of temporal probability of spatiotemporal networks. A. Entropy using  
525 simulated timeseries with variable temporal scale with bin sizes from 10 to 3000 ms. The peak  
526 in the entropy shows a peak in the temporal scale of 200 ms and a spatial scale of 300 regions.  
527 There is clearly a decrease in entropy when using a scale of 400 regions.

528 B. Entropy using the empirical timeseries with a fixed temporal scale of 720 ms. The entropy  
529 follows an inverted U-shaped curve with a at 300 regions with only minor decreases at 100-  
530 400 regions, but with a marked decrease at spatial scales above 500 regions.

531

### A. Empirical functional networks

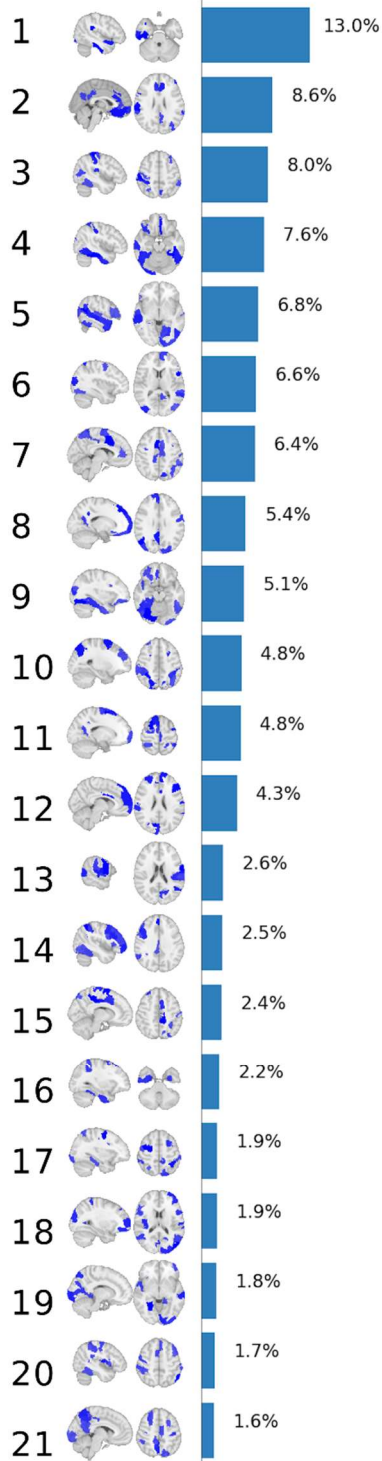

### B. Simulated functional networks

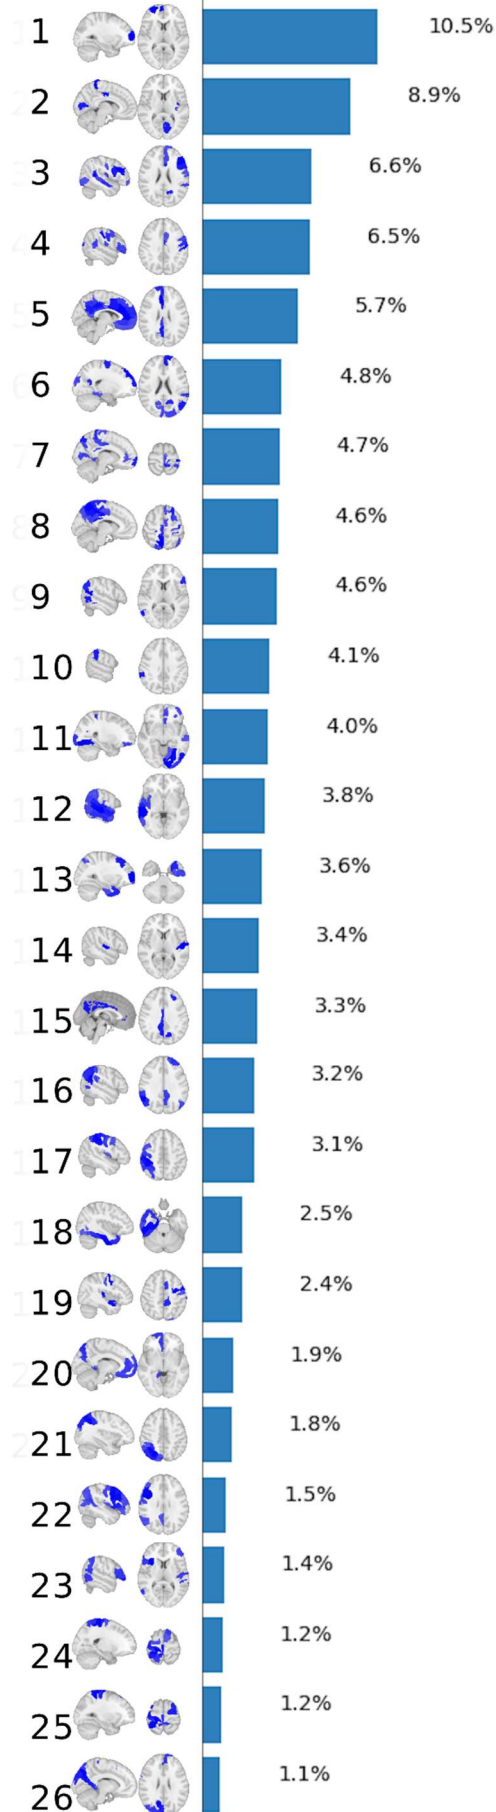

533 Figure 5. Spatiotemporal networks retrieved from empirical timeseries (A) and simulated  
534 timeseries at 200 ms (B) rendered on the standard brain and ordered by their probability of  
535 occurrence in percent.

536

537 **Supplementary files**

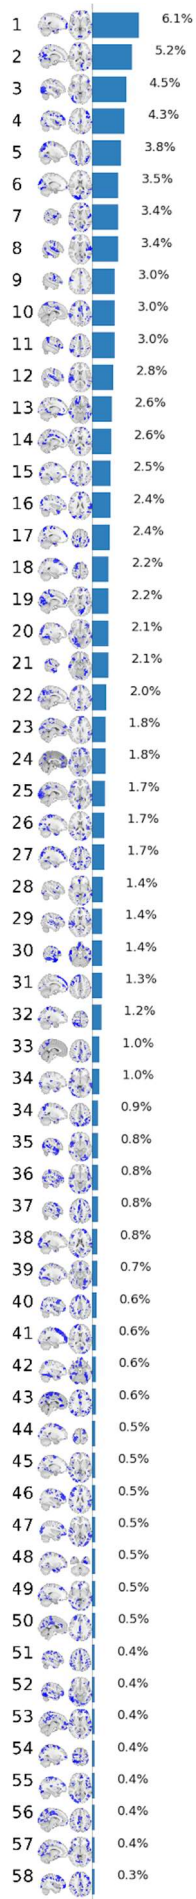

539 Figure S1. Empirical spatiotemporal networks at a spatial scale of  $n = 900$  as derived with an  
540 ICA and their probabilities of occurrence over time (in percent).  
541
